# Supplementary material for: The diversity in antimicrobial resistance of MDR Enterobacteriaceae among Chinese broiler and laying farms and two mcr-1 positive plasmids revealed their resistance-transmission risk
Source: Front Microbiol. 2022 Aug 4;13:912652. doi: 10.3389/fmicb.2022.912652 (PMC9387725; doi:10.3389/fmicb.2022.912652)
Supplement: Supplementary file 4 [file Table_4.XLSX]

## Sheet: Polymyxin
Broiler Farm	mcr-1	0.1234
Broiler Farm	mcr-1	0.1041
Broiler Farm	mcr-1	0.0973
Broiler Farm	mcr-2	0.0041
Broiler Farm	mcr-2	0.0033
Broiler Farm	mcr-2	0.0021
Laying Farm	mcr-1	0.0347
Laying Farm	mcr-1	0.0453
Laying Farm	mcr-1	0.0327
Laying Farm	mcr-2	0.0019
Laying Farm	mcr-2	0
Laying Farm	mcr-2	0

## Sheet: β-lactam
Broiler Farm	bla\-(TEM)	0.823529
Broiler Farm	bla\-(TEM)	0.742857
Broiler Farm	bla\-(TEM)	0.833333
Broiler Farm	bla\-(OXA-1)	0.205882
Broiler Farm	bla\-(OXA-2)	0.2
Broiler Farm	bla\-(OXA-3)	0.138889
Broiler Farm	bla\-(CTX-M)	0.235294
Broiler Farm	bla\-(CTX-M)	0.171429
Broiler Farm	bla\-(CTX-M)	0.111111
Laying Farm	bla\-(TEM)	0.911765
Laying Farm	bla\-(TEM)	0.777778
Laying Farm	bla\-(TEM)	0.657895
Laying Farm	bla\-(OXA-1)	0.117647
Laying Farm	bla\-(OXA-2)	0.138889
Laying Farm	bla\-(OXA-3)	0.0526316
Laying Farm	bla\-(CTX-M)	0.0588235
Laying Farm	bla\-(CTX-M)	0.0833333
Laying Farm	bla\-(CTX-M)	0.0526316

## Sheet: Quinolones
Broiler Farm	qnrA	0.323529
Broiler Farm	qnrA	0.228571
Broiler Farm	qnrA	0.305556
Broiler Farm	qnrB	0.147059
Broiler Farm	qnrB	0.2
Broiler Farm	qnrB	0.138889
Broiler Farm	qnrD	0.205882
Broiler Farm	qnrD	0.0857143
Broiler Farm	qnrD	0.111111
Broiler Farm	qnrS	0.382353
Broiler Farm	qnrS	0.257143
Broiler Farm	qnrS	0.277778
Laying Farm	qnrA	0.382353
Laying Farm	qnrA	0.222222
Laying Farm	qnrA	0.236842
Laying Farm	qnrB	0.0882353
Laying Farm	qnrB	0.111111
Laying Farm	qnrB	0.0526316
Laying Farm	qnrD	0.0588235
Laying Farm	qnrD	0.138889
Laying Farm	qnrD	0.0526316
Laying Farm	qnrS	0.294118
Laying Farm	qnrS	0.333333
Laying Farm	qnrS	0.342105

## Sheet: Macrolides
Broiler Farm	mphA	0.735294
Broiler Farm	mphA	0.657143
Broiler Farm	mphA	0.555556
Broiler Farm	mphB	0.176471
Broiler Farm	mphB	0.2
Broiler Farm	mphB	0.138889
Broiler Farm	mphD	0.0882353
Broiler Farm	mphD	0.114286
Broiler Farm	mphD	0.138889
Broiler Farm	mphE	0.382353
Broiler Farm	mphE	0.285714
Broiler Farm	mphE	0.305556
Broiler Farm	ermA	0.0588235
Broiler Farm	ermA	0.0285714
Broiler Farm	ermA	0.0555556
Laying Farm	mphA	0.676471
Laying Farm	mphA	0.555556
Laying Farm	mphA	0.631579
Laying Farm	mphB	0.0882353
Laying Farm	mphB	0.111111
Laying Farm	mphB	0.105263
Laying Farm	mphD	0.117647
Laying Farm	mphD	0.0277778
Laying Farm	mphD	0.105263
Laying Farm	mphE	0.294118
Laying Farm	mphE	0.333333
Laying Farm	mphE	0.342105
Laying Farm	ermA	0.0882353
Laying Farm	ermA	0.0555556
Laying Farm	ermA	0.0789474

## Sheet: Tetracycline
Broiler Farm	tetA	0.823529
Broiler Farm	tetA	0.742857
Broiler Farm	tetA	0.833333
Broiler Farm	tetB	0.294118
Broiler Farm	tetB	0.257143
Broiler Farm	tetB	0.305556
Broiler Farm	tetD	0.235294
Broiler Farm	tetD	0.114286
Broiler Farm	tetD	0.194444
Laying Farm	tetA	0.911765
Laying Farm	tetA	0.777778
Laying Farm	tetA	0.842105
Laying Farm	tetB	0.235294
Laying Farm	tetB	0.194444
Laying Farm	tetB	0.236842
Laying Farm	tetD	0.205882
Laying Farm	tetD	0.0833333
Laying Farm	tetD	0.131579

## Sheet: Chloramphenicol 
Broiler Farm	catA1	0.294118
Broiler Farm	catA1	0.371429
Broiler Farm	catA1	0.361111
Broiler Farm	catA2	0.235294
Broiler Farm	catA2	0.114286
Broiler Farm	catA2	0.138889
Broiler Farm	catA3	0.147059
Broiler Farm	catA3	0.0857143
Broiler Farm	catA3	0.111111
Broiler Farm	floR	0.529412
Broiler Farm	floR	0.428571
Broiler Farm	floR	0.527778
Broiler Farm	cmlA	0.147059
Broiler Farm	cmlA	0.0857143
Broiler Farm	cmlA	0.111111
Laying Farm	catA1	0.294118
Laying Farm	catA1	0.25
Laying Farm	catA1	0.210526
Laying Farm	catA2	0.176471
Laying Farm	catA2	0.138889
Laying Farm	catA2	0.105263
Laying Farm	catA3	0.117647
Laying Farm	catA3	0.0555556
Laying Farm	catA3	0.0789474
Laying Farm	floR	0.5
Laying Farm	floR	0.555556
Laying Farm	floR	0.473684
Laying Farm	cmlA	0.0882353
Laying Farm	cmlA	0.0555556
Laying Farm	cmlA	0.184211

## Sheet: Aminoglycosides
Broiler Farm	aph(3')-Ia	0.117647
Broiler Farm	aph(3')-Ia	0.0857143
Broiler Farm	aph(3')-Ia	0.111111
Broiler Farm	aacC	0.147059
Broiler Farm	aacC	0.114286
Broiler Farm	aacC	0.0555556
Broiler Farm	aadA2	0.0882353
Broiler Farm	aadA2	0.0571429
Broiler Farm	aadA2	0.0555556
Broiler Farm	aac(6')-Ib-cr	0.205882
Broiler Farm	aac(6')-Ib-cr	0.2
Broiler Farm	aac(6')-Ib-cr	0.25
Laying Farm	aph(3')-Ia	0.0588235
Laying Farm	aph(3')-Ia	0.138889
Laying Farm	aph(3')-Ia	0.0263158
Laying Farm	aacC	0.0882353
Laying Farm	aacC	0.138889
Laying Farm	aacC	0.0789474
Laying Farm	aadA2	0
Laying Farm	aadA2	0
Laying Farm	aadA2	0
Laying Farm	aac(6')-Ib-cr	0.176471
Laying Farm	aac(6')-Ib-cr	0.111111
Laying Farm	aac(6')-Ib-cr	0.184211

## Sheet: Fosfomycin
Broiler Farm	fosA3	0.235294
Broiler Farm	fosA3	0.228571
Broiler Farm	fosA3	0.25
Broiler Farm	fosB	0.0882353
Broiler Farm	fosB	0.0857143
Broiler Farm	fosB	0.111111
Laying Farm	fosA3	0.205882
Laying Farm	fosA3	0.166667
Laying Farm	fosA3	0.236842
Laying Farm	fosB	0.0294118
Laying Farm	fosB	0.0555556
Laying Farm	fosB	0.0526316

## Sheet: Sulfonamides 
Broiler Farm	sul1	0.735294
Broiler Farm	sul1	0.685714
Broiler Farm	sul1	0.777778
Broiler Farm	folp1	0.205882
Broiler Farm	folp2	0.171429
Broiler Farm	folp3	0.166667
Laying Farm	sul1	0.535294
Laying Farm	sul1	0.562222
Laying Farm	sul1	0.589474
Laying Farm	folp1	0.264706
Laying Farm	folp2	0.194444
Laying Farm	folp3	0.184211
